# Supplementary material for: Modeling primary microcephaly with human brain organoids reveals fundamental roles of CIT kinase activity
Source: PubMed Central journal article supplement (PMC11527453; doi:10.1172/jci175435), 2024-11-01

# Full unedited gel for Figure 2

E

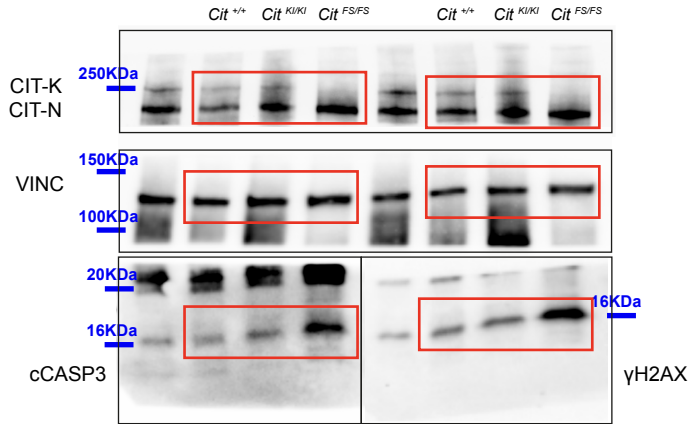

### Full unedited gel for Figure 3

**C**

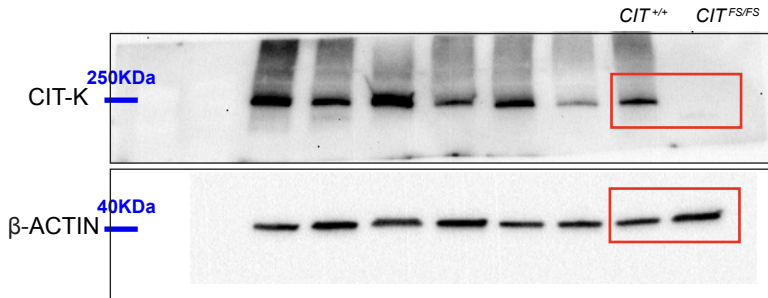

**D**

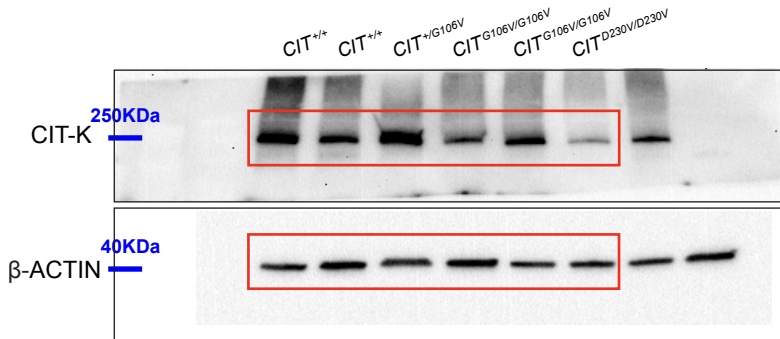

# Full unedited gel for Figure S1

**B**

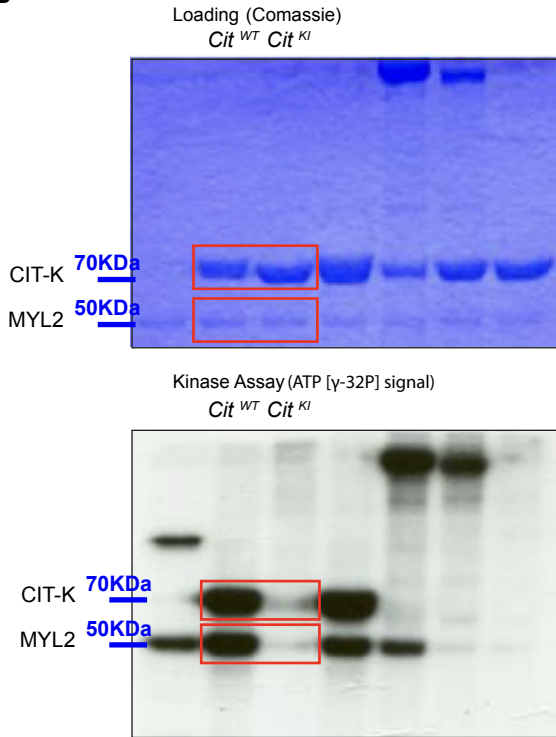

**E**

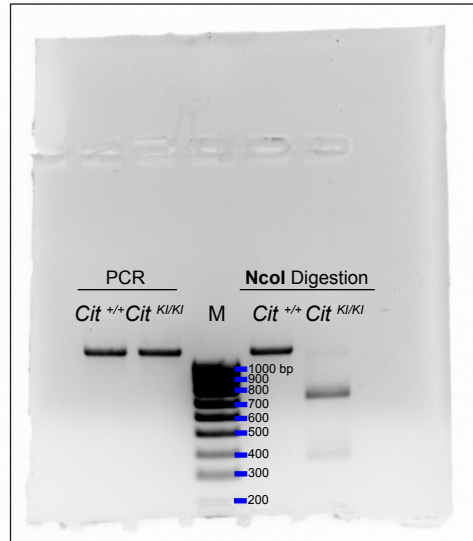

**F**

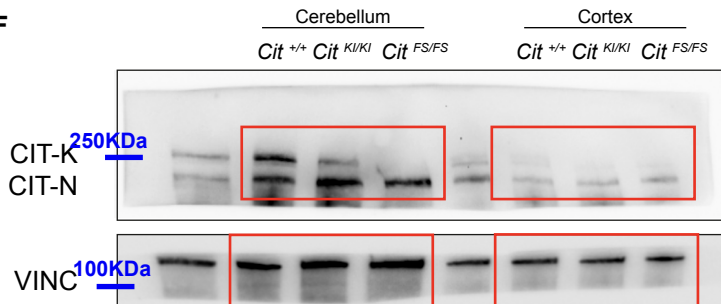

Supplement: jci-134-175435-s120.pdf [file jci-134-175435-s120.pdf]
